# Supplementary material
Source: PubMed Central journal article supplement (PMC6086768)

**a**

**Hallmarks enriched in siCTRL (siCTRLvs siRNA1)**

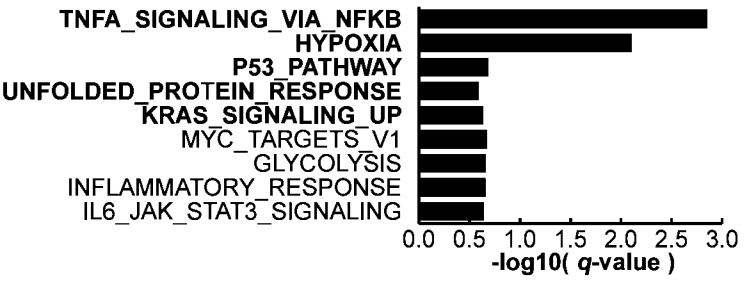

**Hallmarks enriched in siCTRL (siCTRLvs siRNA2)**

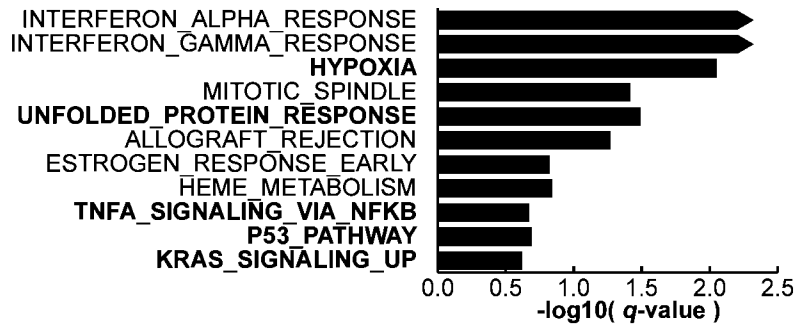

**Hallmarks enriched in siRNA (siRNA1 vs siCTRL)**

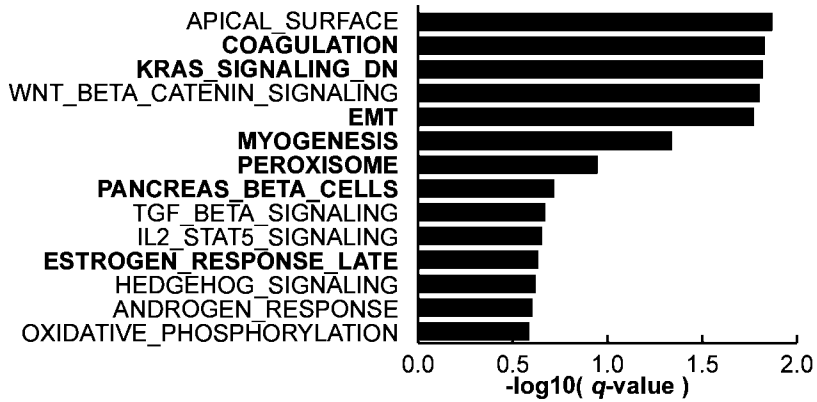

**Hallmarks enriched in siRNA1 (siRNA2 vs siCTRL)**

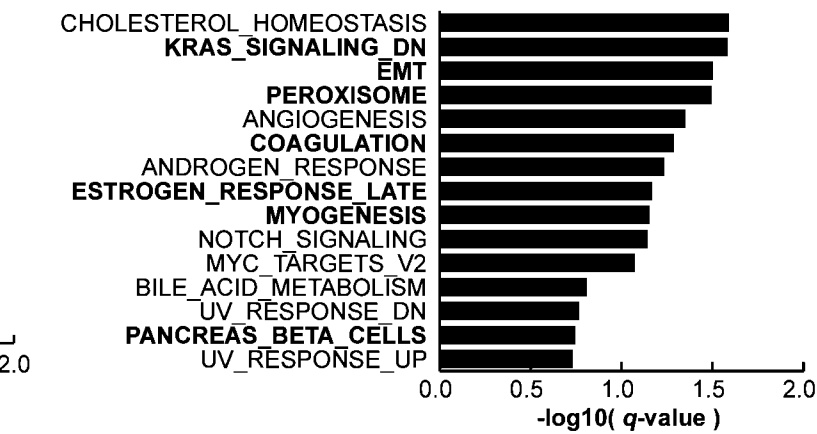

**b**

**FAM83H-AS1 Molecular interactions (TCGA, n=147)**

**MSigDB (positively regulated):**

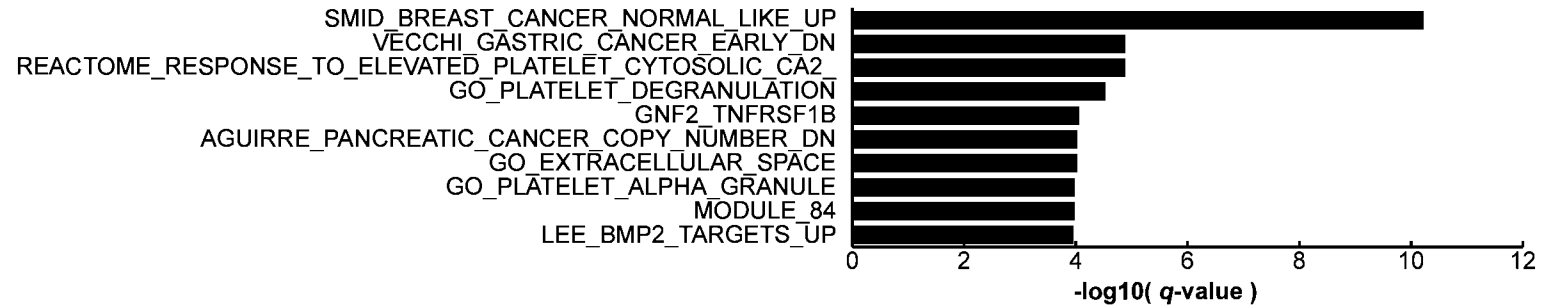

**MSigDB (negatively regulated):**

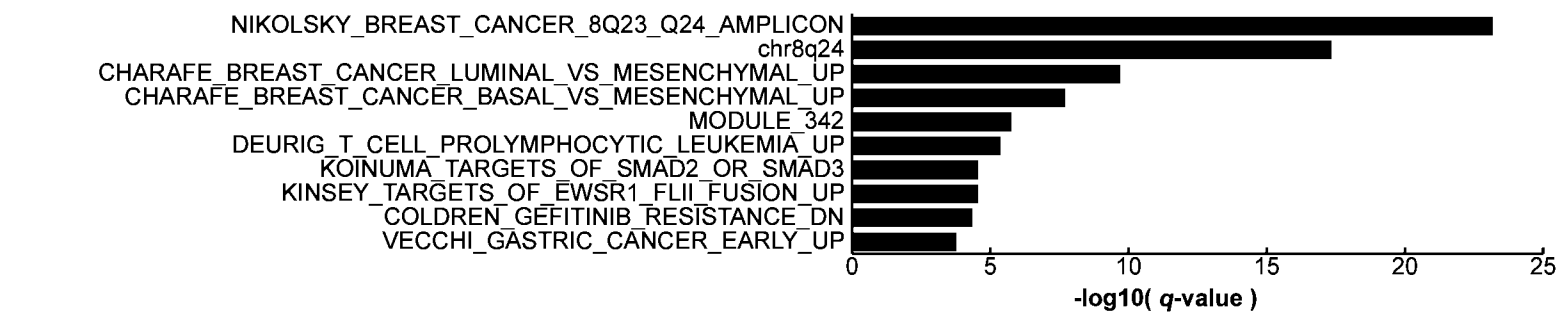

Supplement: NIHMS955934-supplement-Sup__Fig__8.pdf [file NIHMS955934-supplement-Sup__Fig__8.pdf]
