# Supplementary material
Source: PubMed Central journal article supplement (PMC6086768)

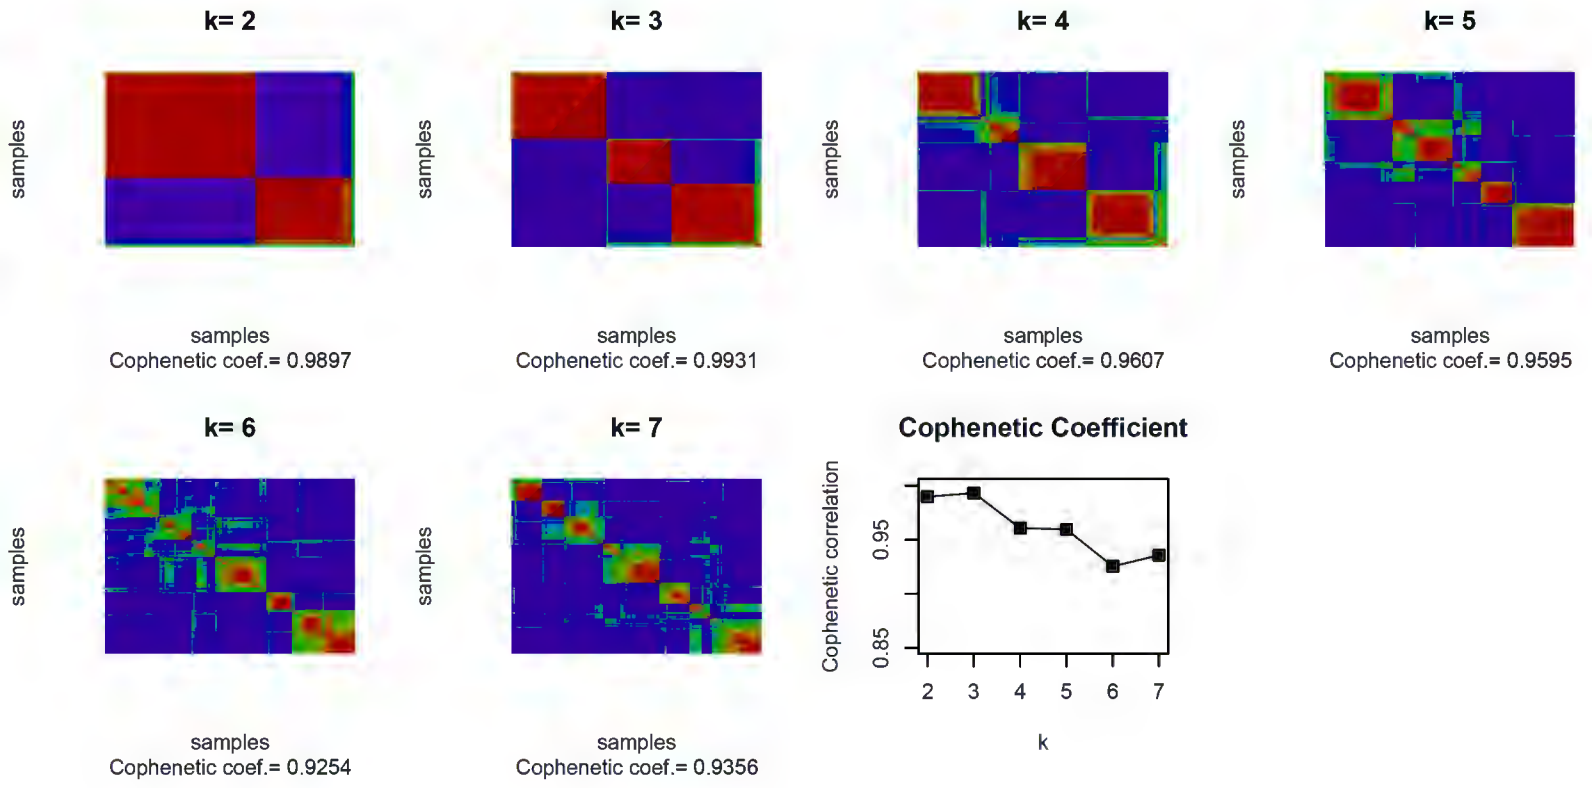

Supplement: NIHMS955934-supplement-Sup__Fig__1.pdf [file NIHMS955934-supplement-Sup__Fig__1.pdf]

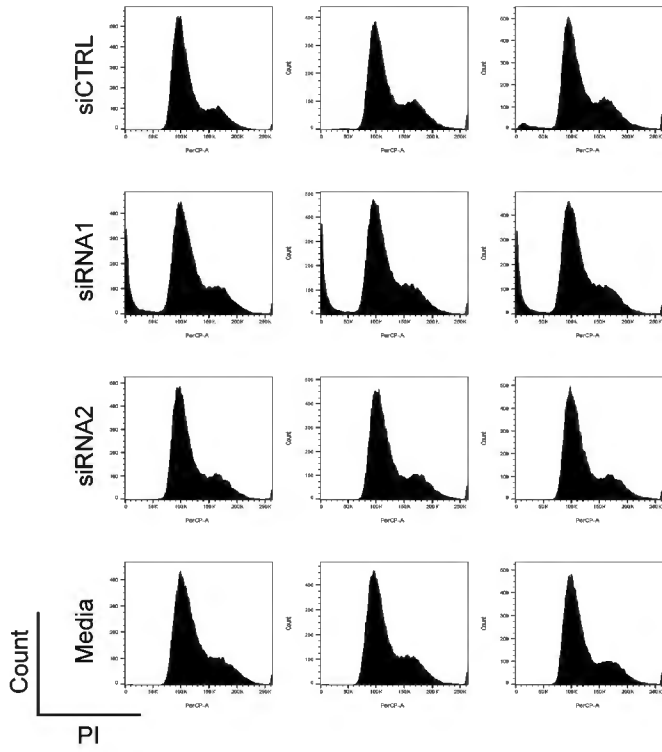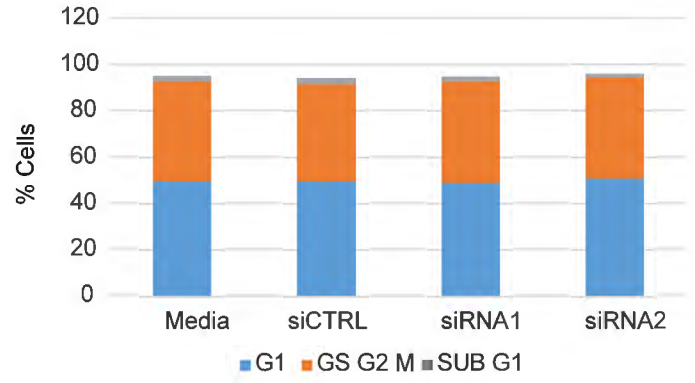

Supplement: NIHMS955934-supplement-Sup__Fig__10.pdf [file NIHMS955934-supplement-Sup__Fig__10.pdf]

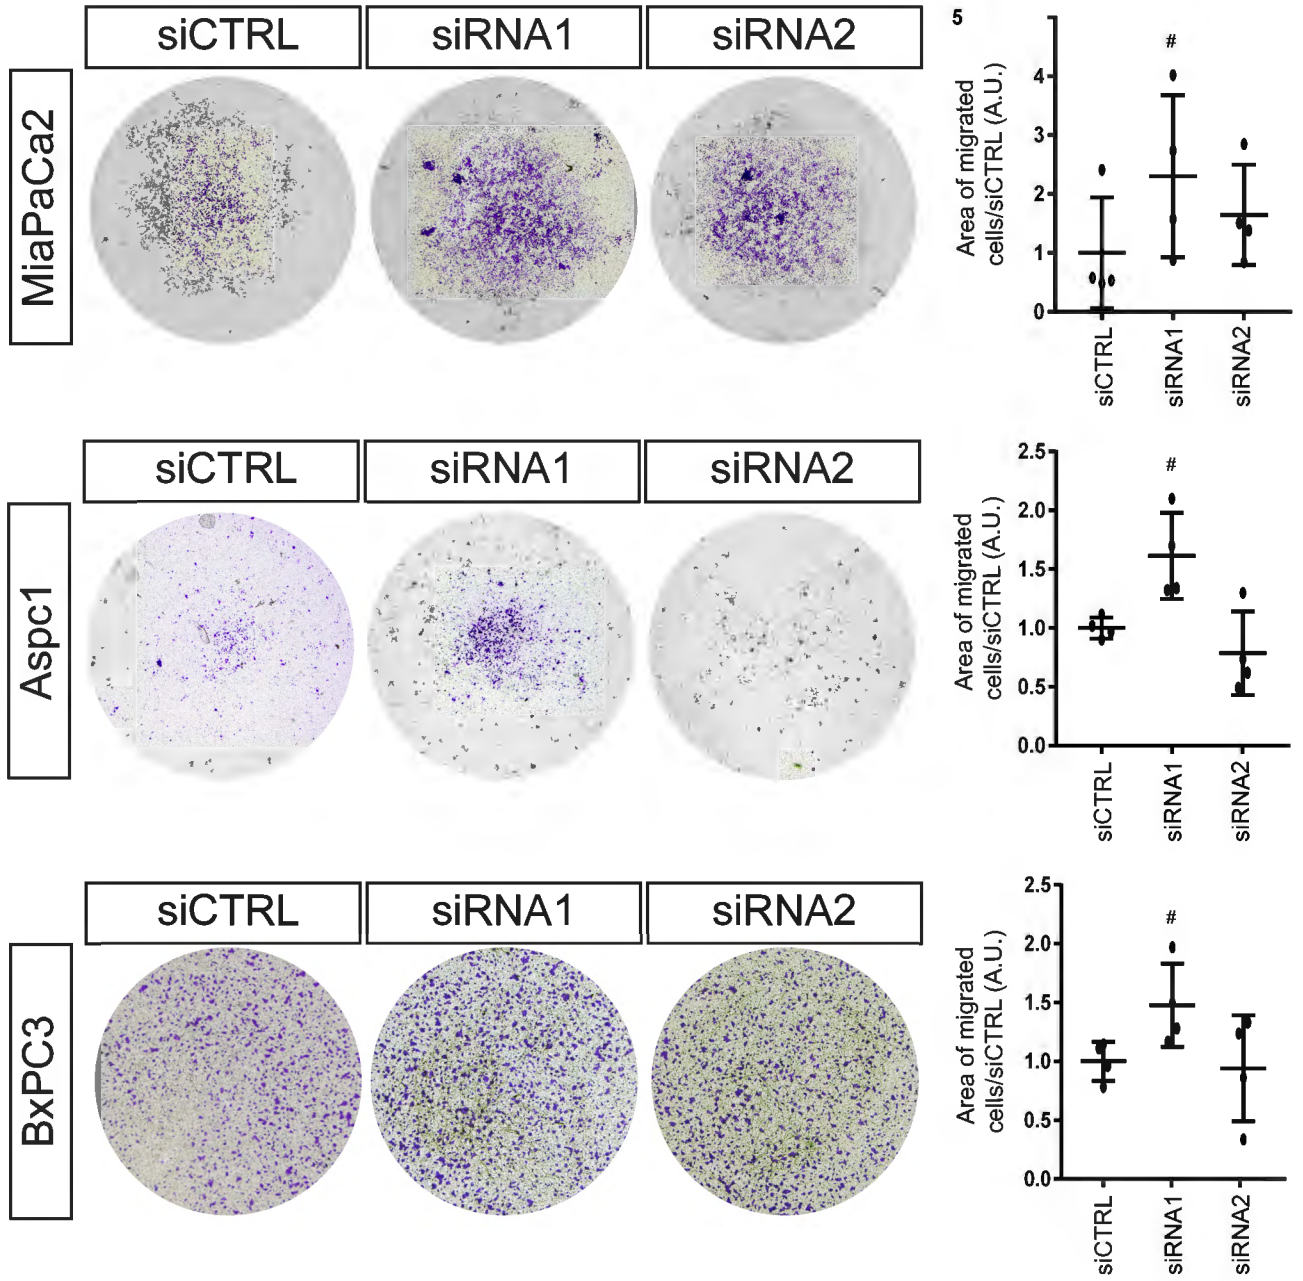

Supplement: NIHMS955934-supplement-Sup__Fig__12.pdf [file NIHMS955934-supplement-Sup__Fig__12.pdf]

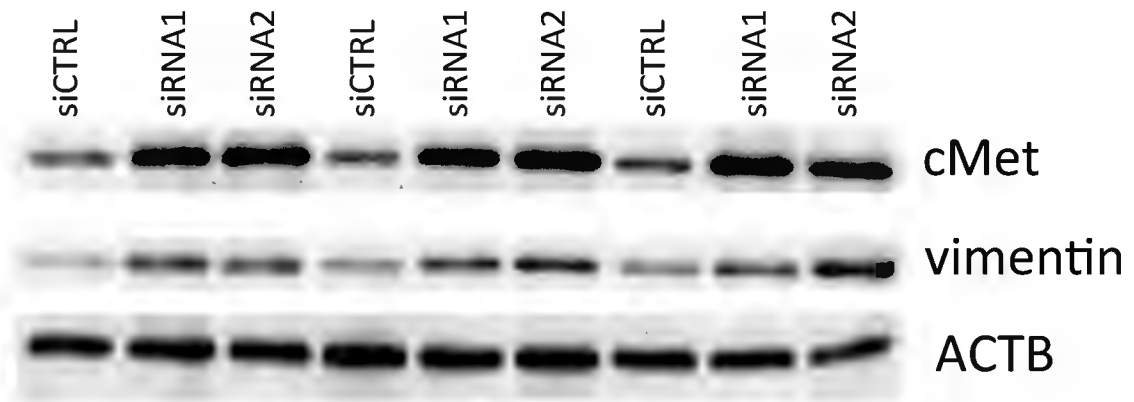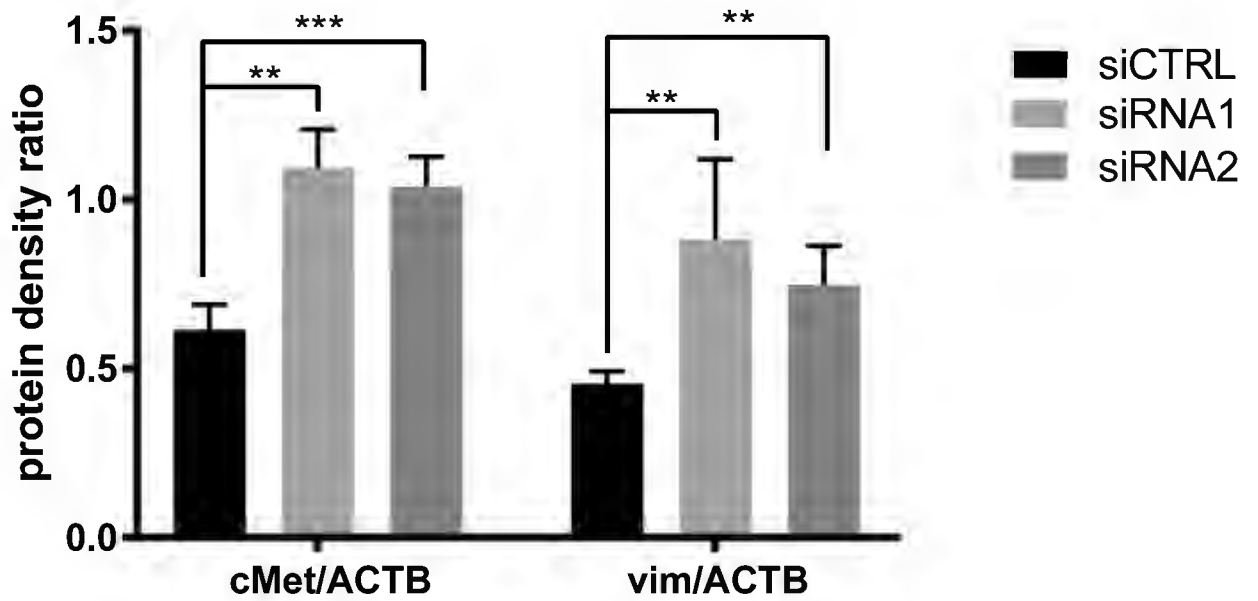

Supplement: NIHMS955934-supplement-Sup__Fig__13.pdf [file NIHMS955934-supplement-Sup__Fig__13.pdf]

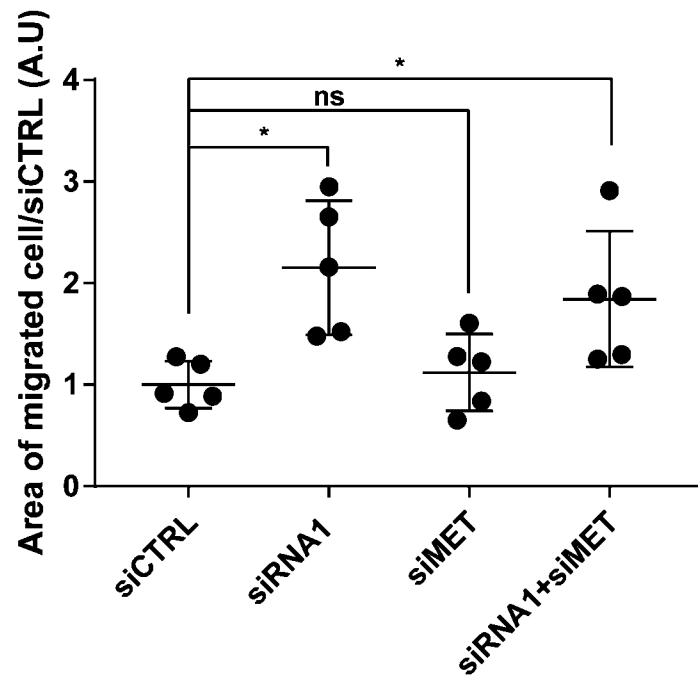

Supplement: NIHMS955934-supplement-Sup__Fig__15.pdf [file NIHMS955934-supplement-Sup__Fig__15.pdf]

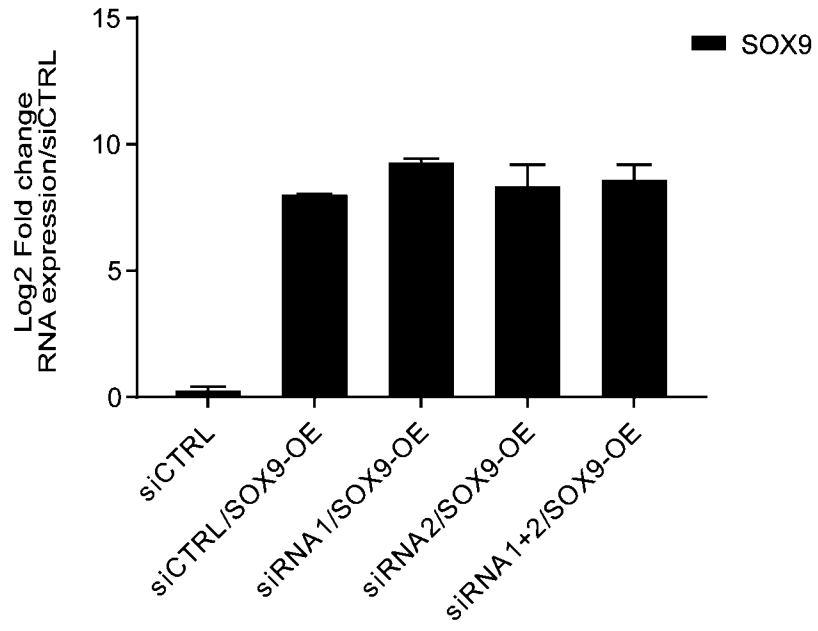

Supplement: NIHMS955934-supplement-Sup__Fig__16.pdf [file NIHMS955934-supplement-Sup__Fig__16.pdf]

**a**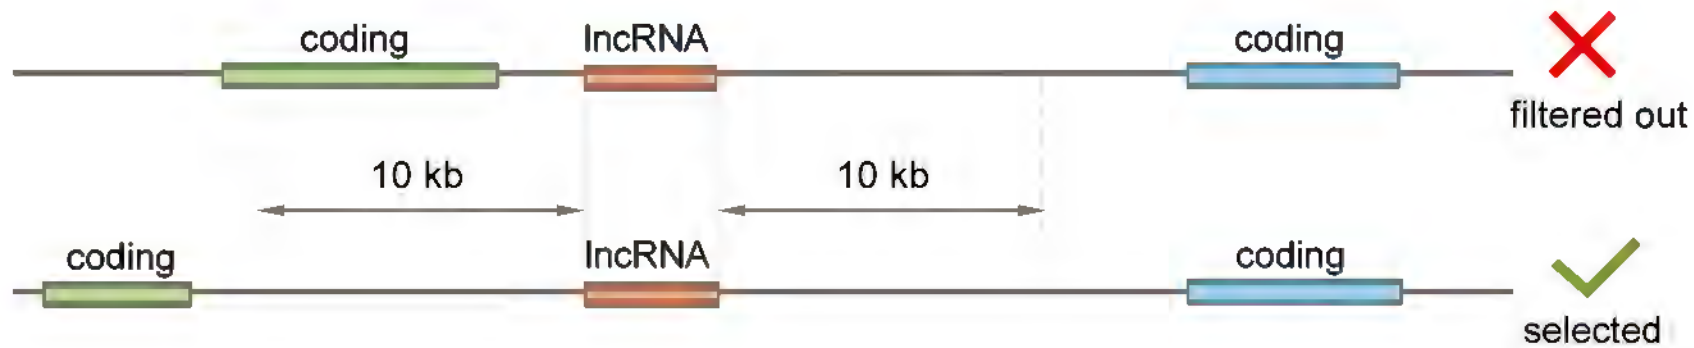**b**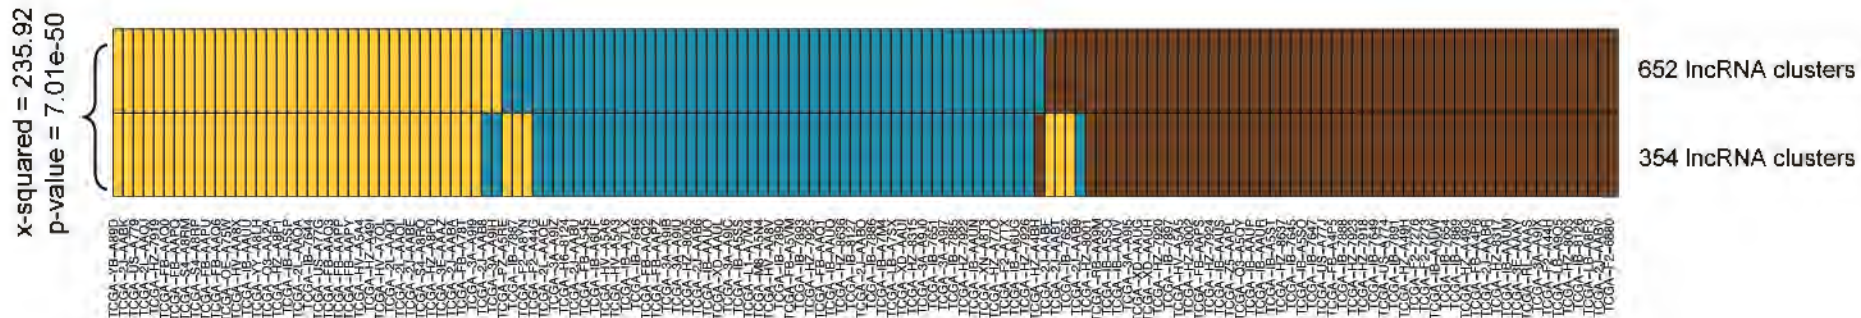

Supplement: NIHMS955934-supplement-Sup__Fig__2.pdf [file NIHMS955934-supplement-Sup__Fig__2.pdf]

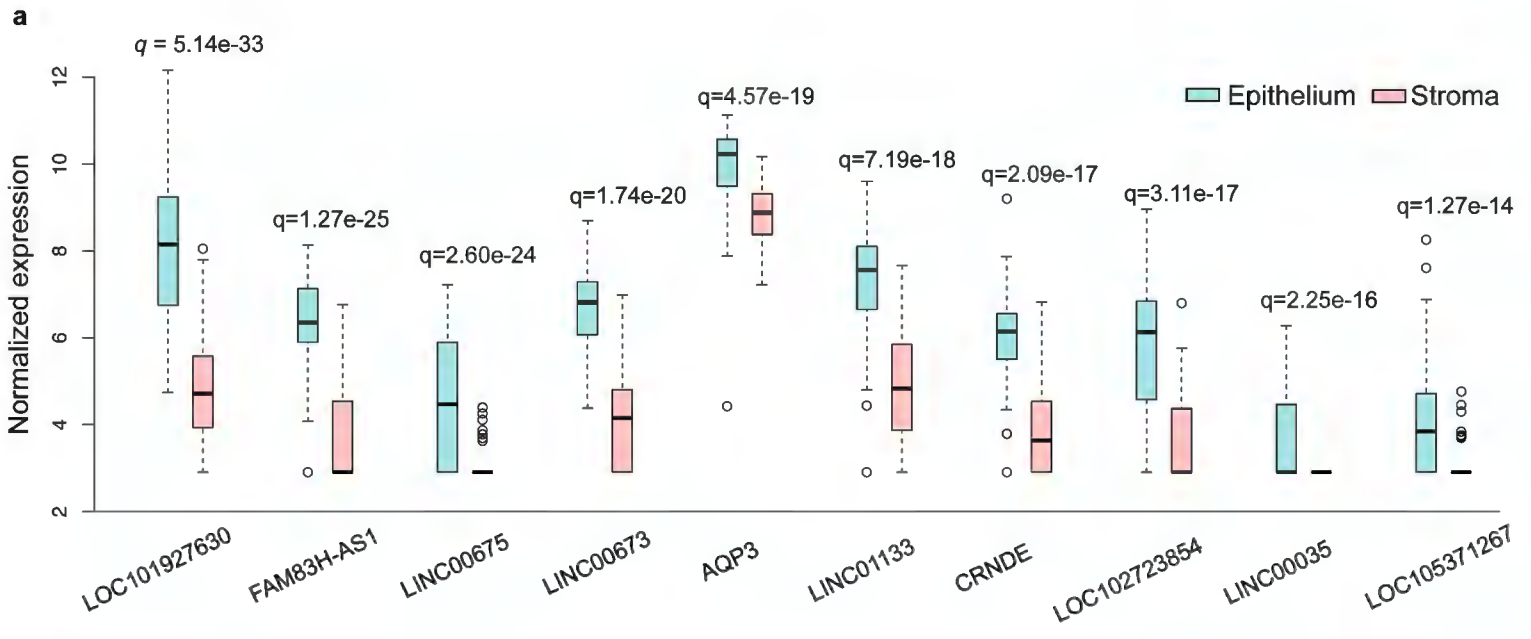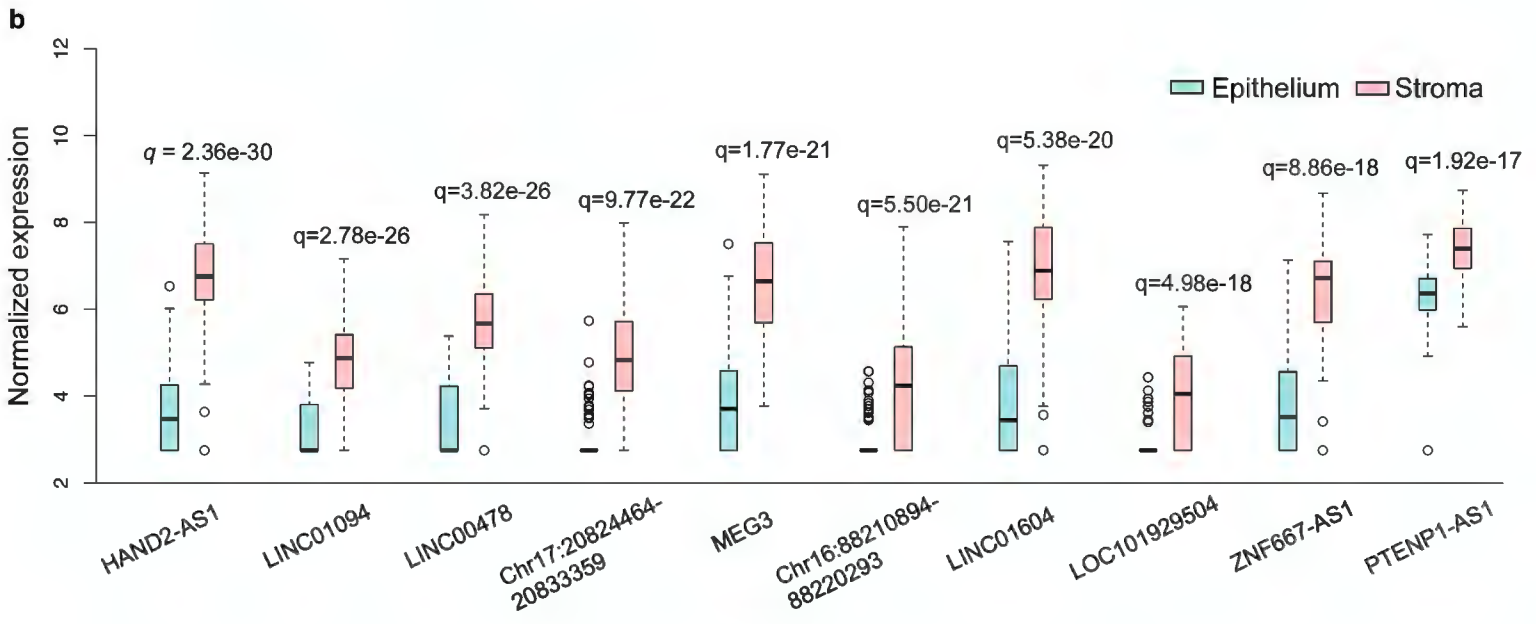

Supplement: NIHMS955934-supplement-Sup__Fig__5.pdf [file NIHMS955934-supplement-Sup__Fig__5.pdf]
